# Supplementary material
Source: publisher figshare collection journal article supplement (https://tandf.figshare.com/articles/dataset/_/5363866)

# STREAM TYPES OF THE LAKE KINNERET (SEA OF GALILEE) WATERSHED

Yaron Hershkovitz, Daniel Hering, Gideon Gal, Tanja Pottgiesser, Christian K. Feld

## **Supplementary Material-3: Stream type examples**

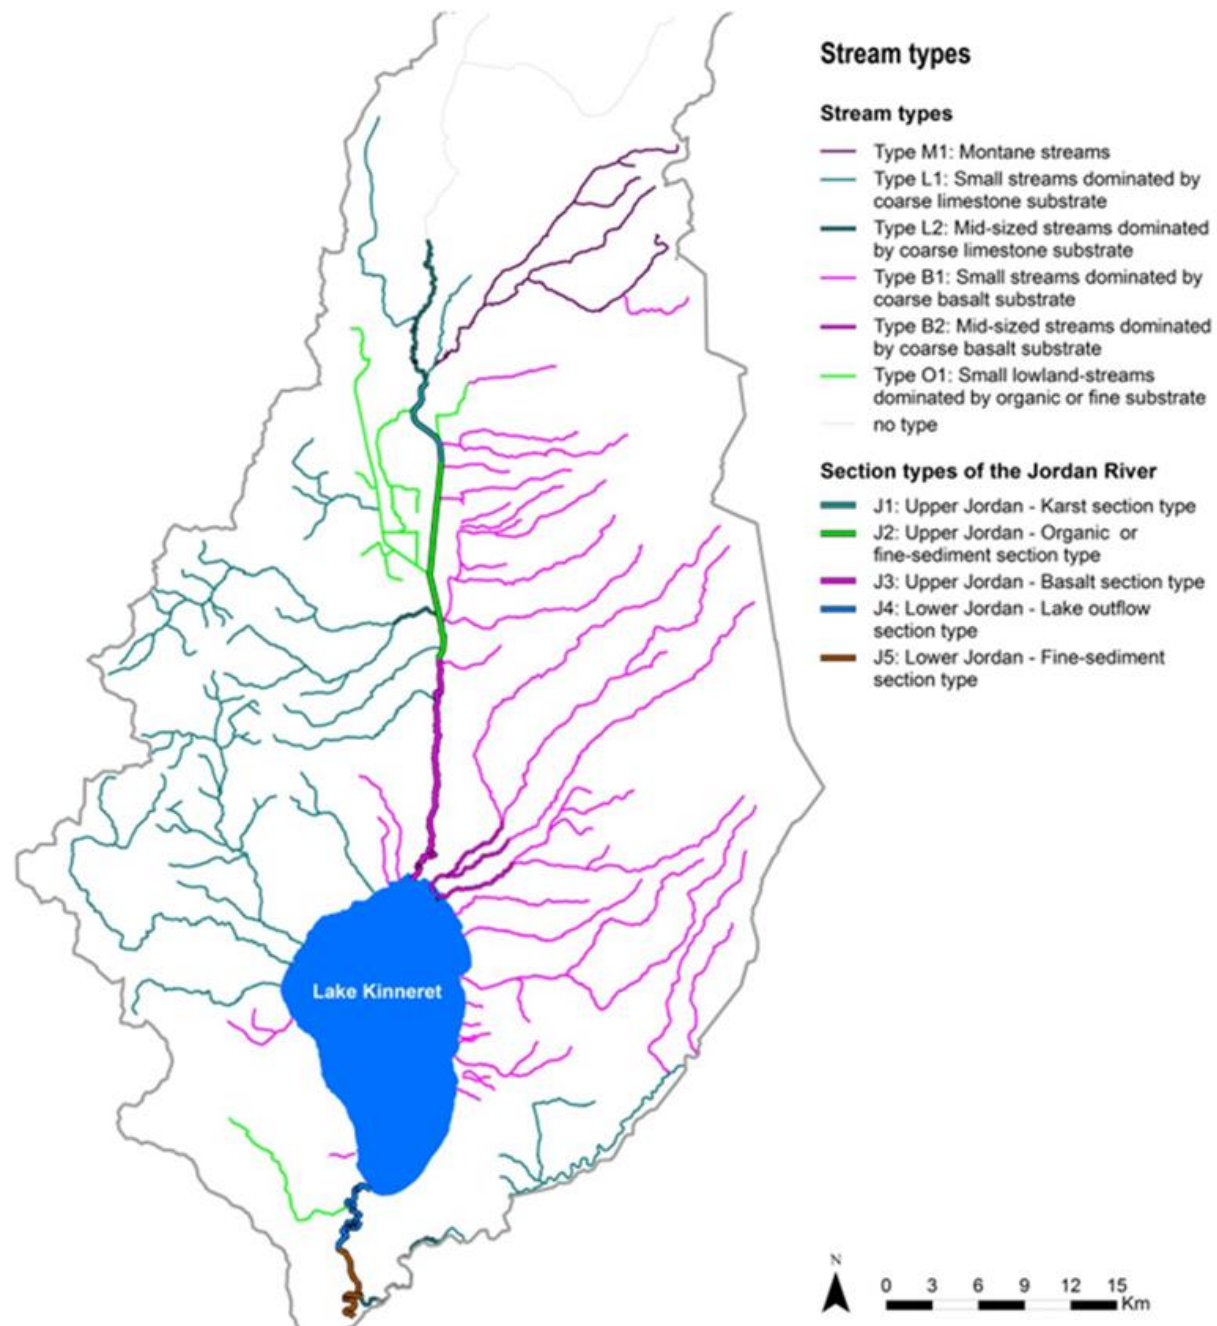

# M1: MOUNTAINOUS STREAMS

Intermittent stream (Saar - Ein Kinya)

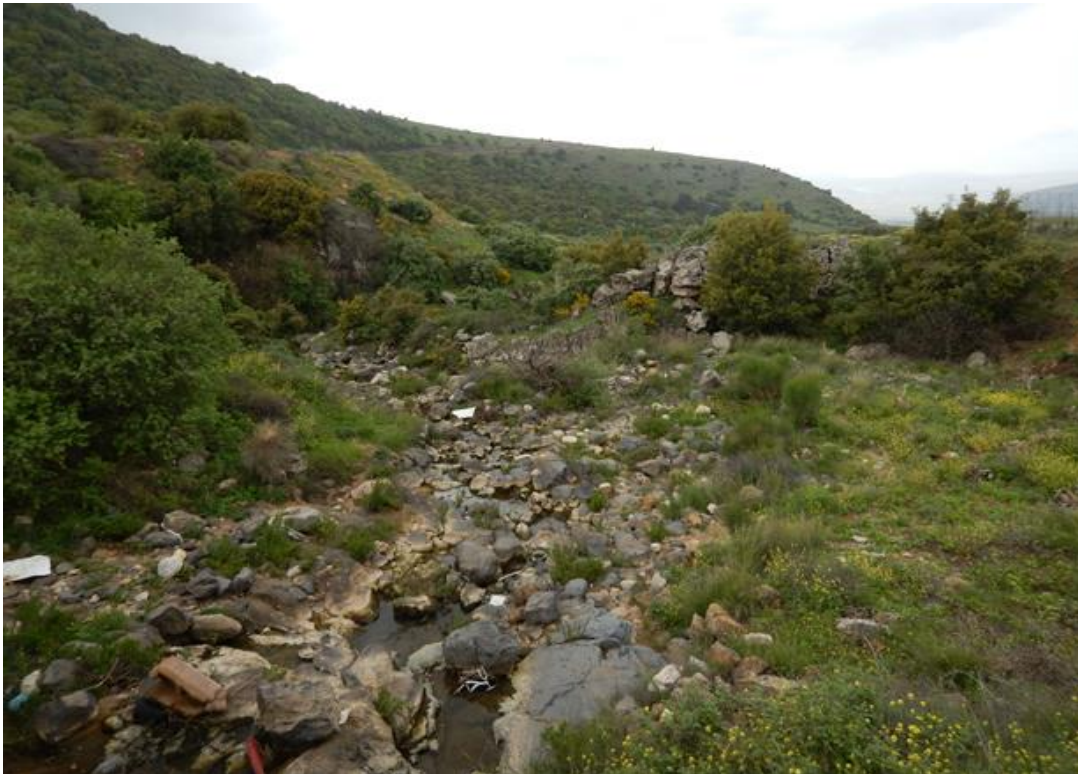

Perennial stream (Hermon – Banias reserve)

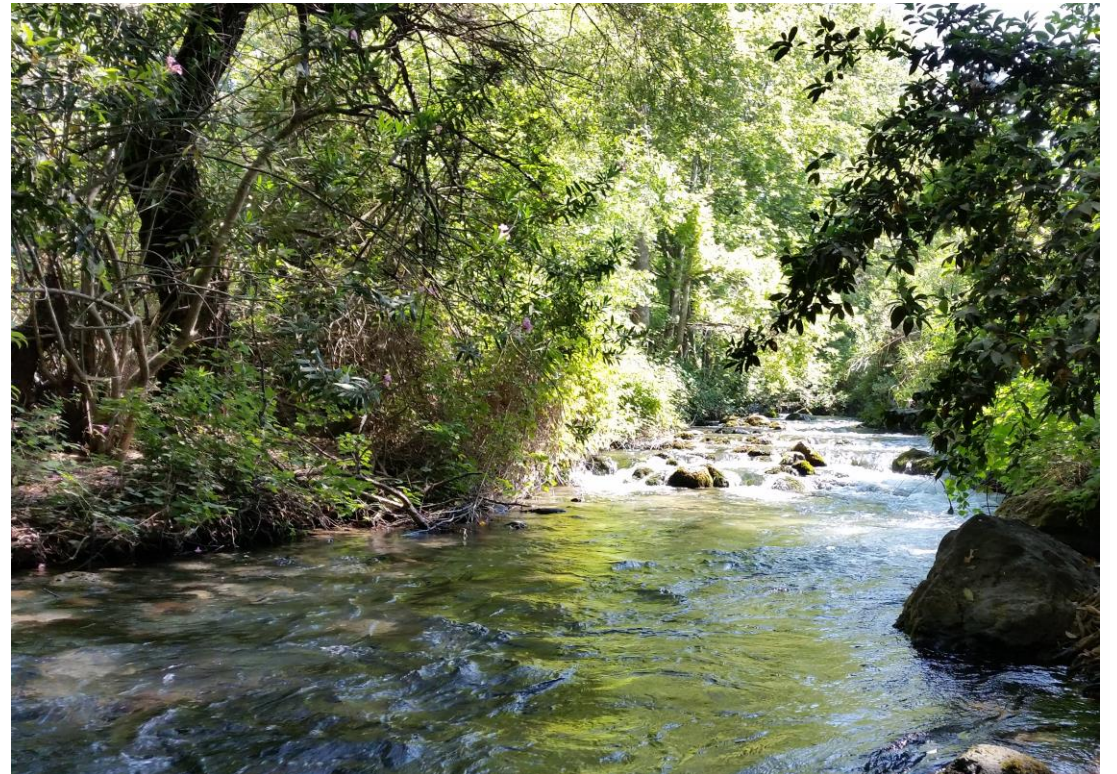



# C1: SMALL STREAMS DOMINATED BY COARSE CALCAREOUS SUBSTRATE

Ayun (Ha'Tanur Reserve)

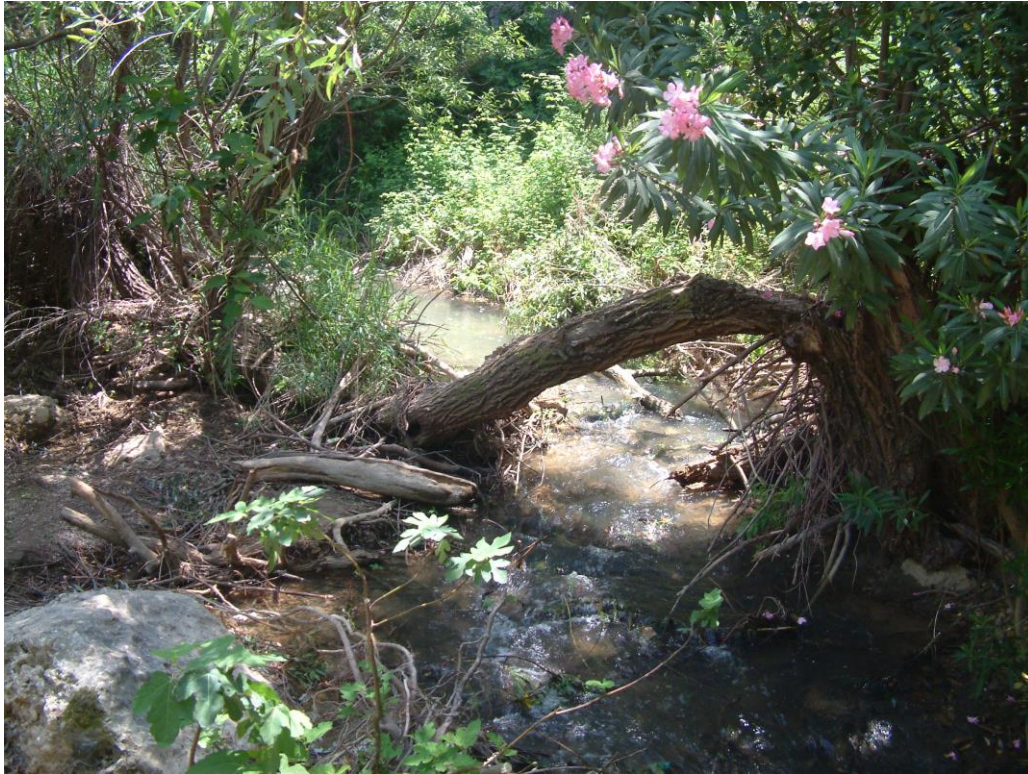

Gush -Halav

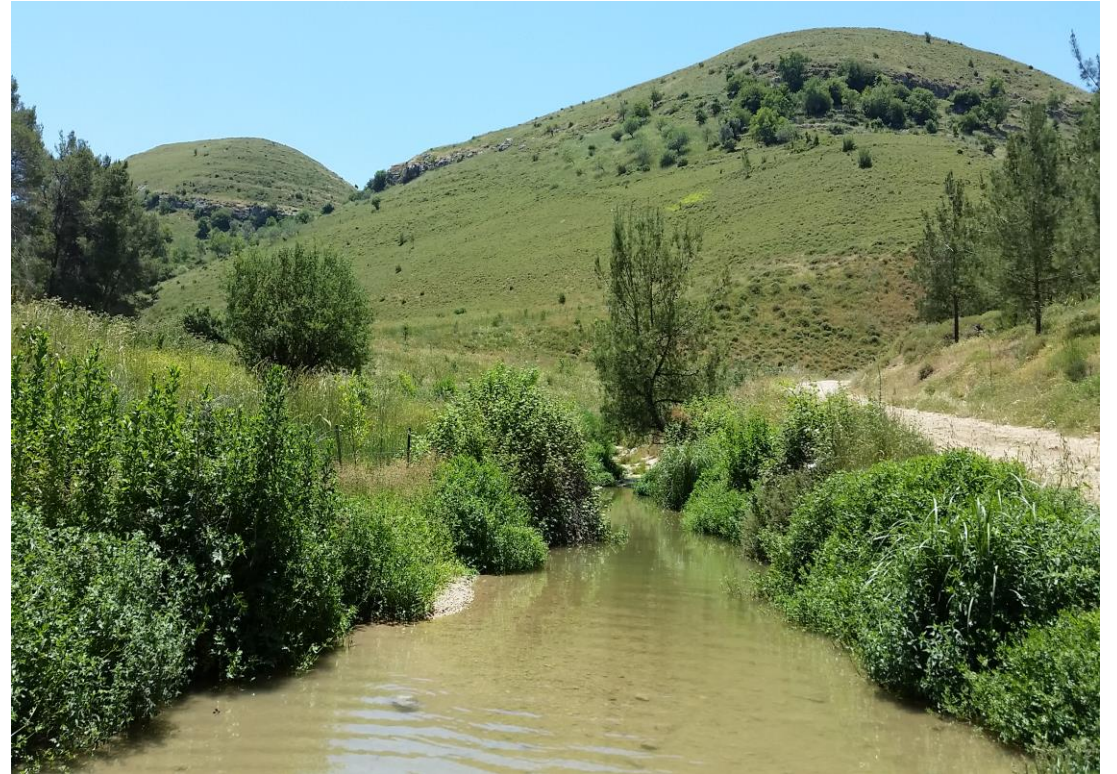



## C2: MID-SIZED STREAMS DOMINATED BY COARSE CALCAREOUS SUBSTRATE

Snir (Nature Reserve)

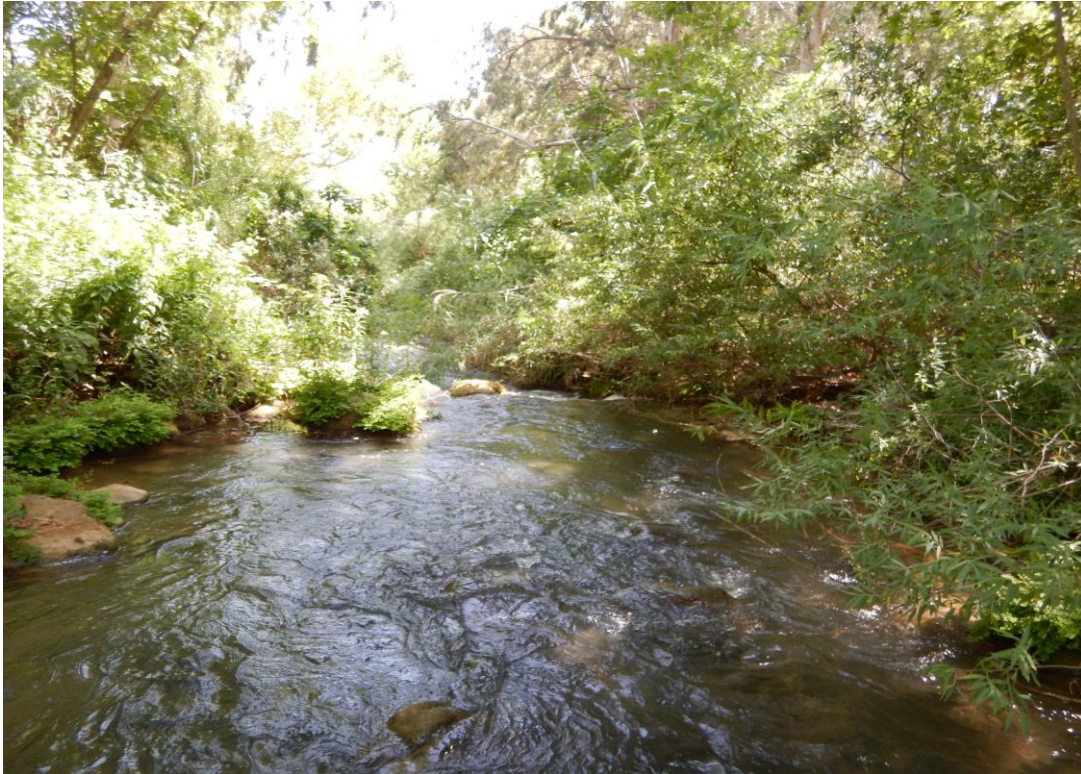

Snir (Bet Hillel)

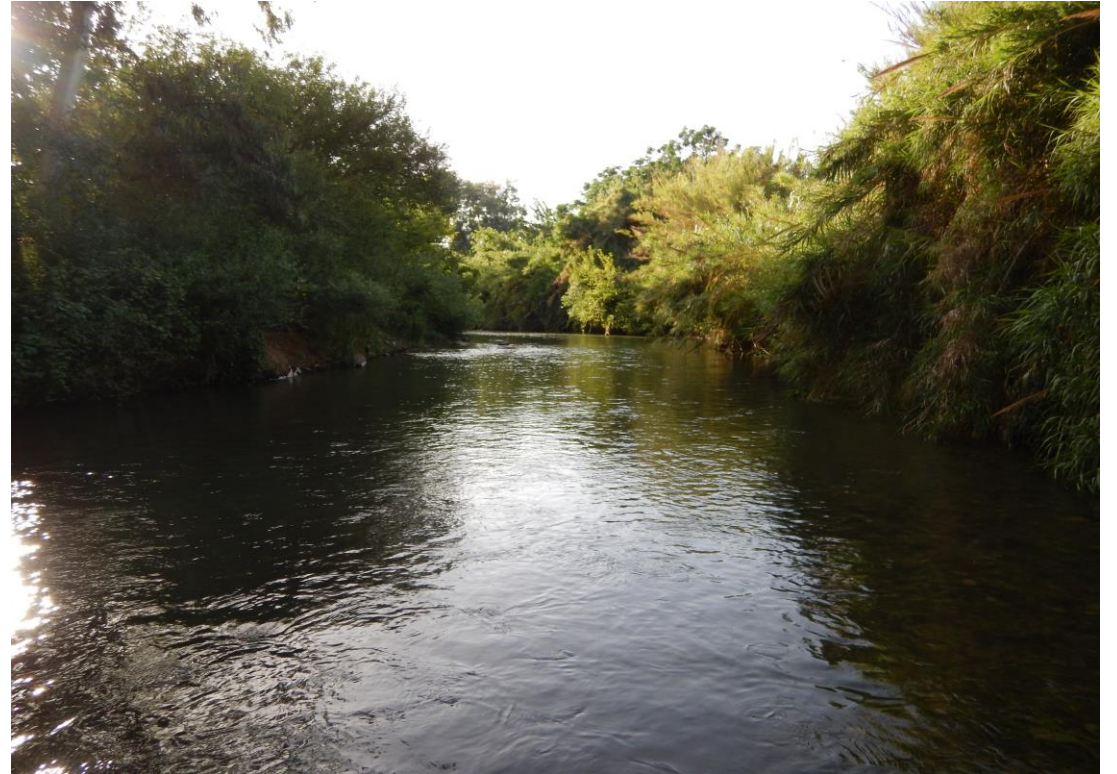



## B1: SMALL STREAMS DOMINATED BY COARSE BASALT SUBSTRATE

Shuah (el Fagar)

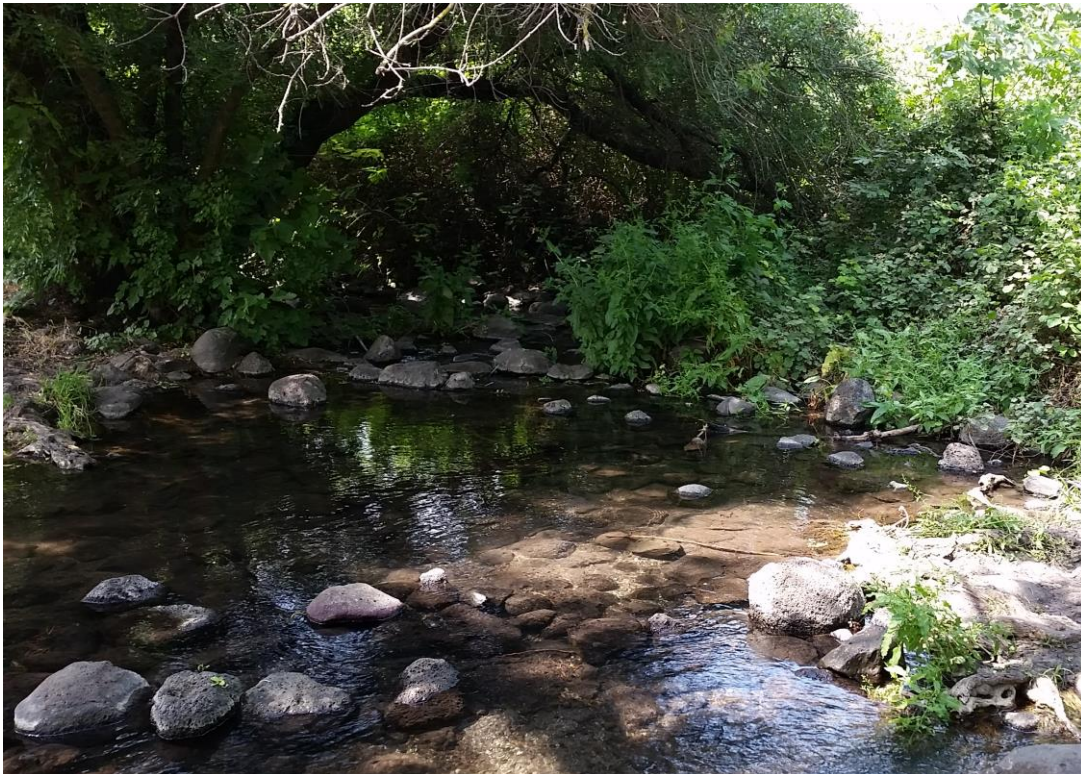

Lower Yehudya

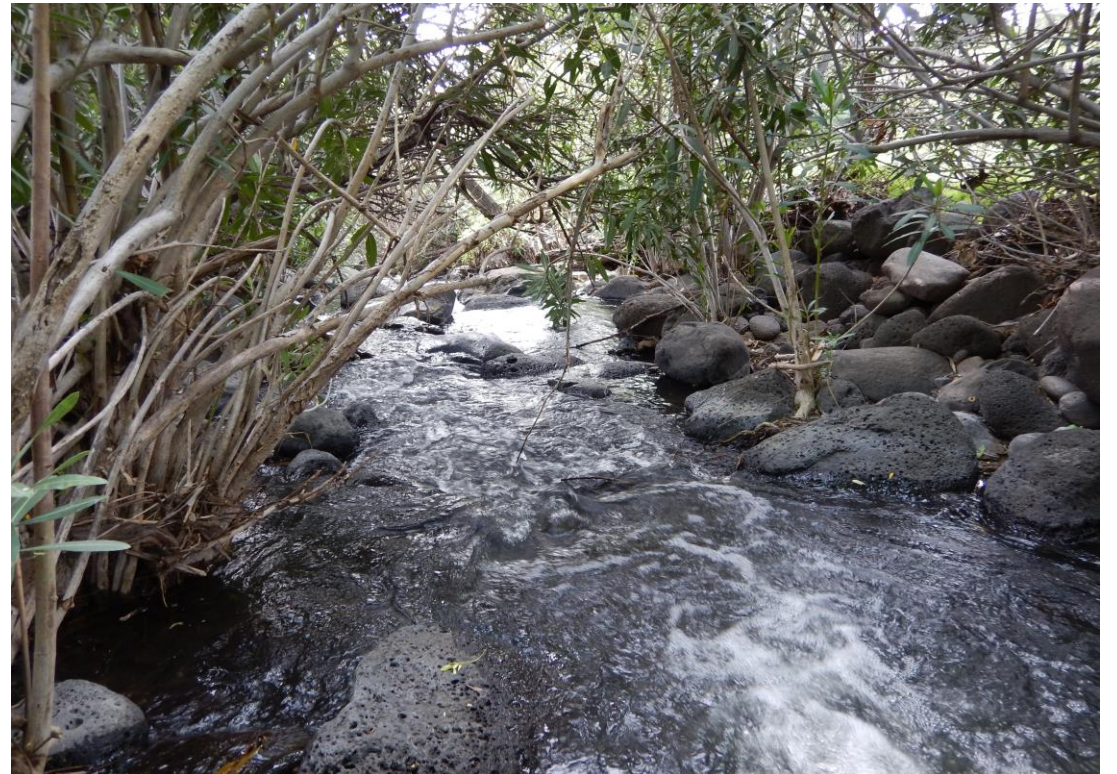



## B2: MID-SIZED STREAMS DOMINATED BY COARSE BASALT SUBSTRATE

Lower Meshushim

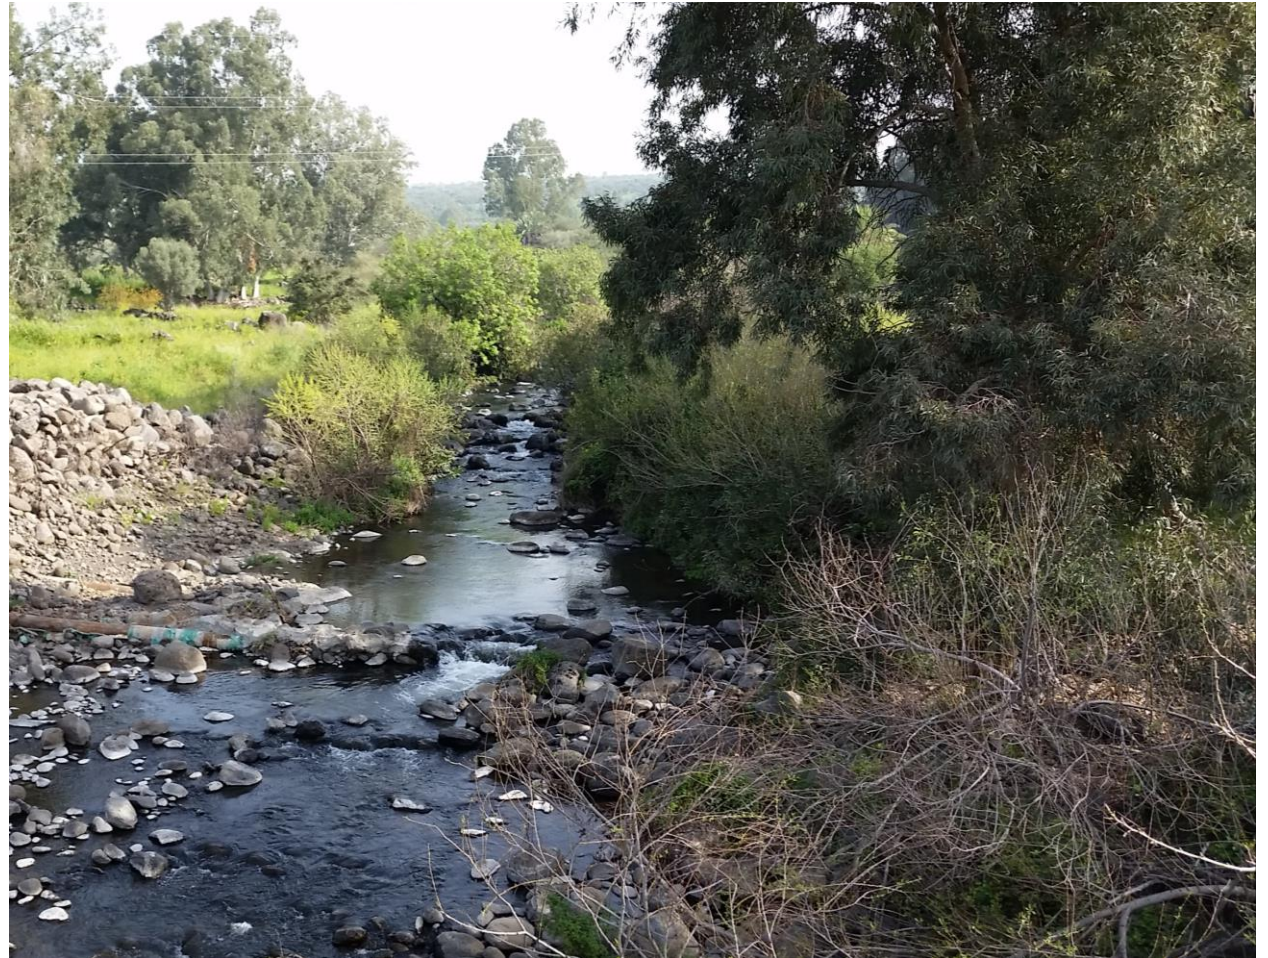



# O1: SMALL LOWLAND-STREAMS DOMINATED BY ORGANIC OR FINE SUBSTRATE

Jordan (Kfar Blum)

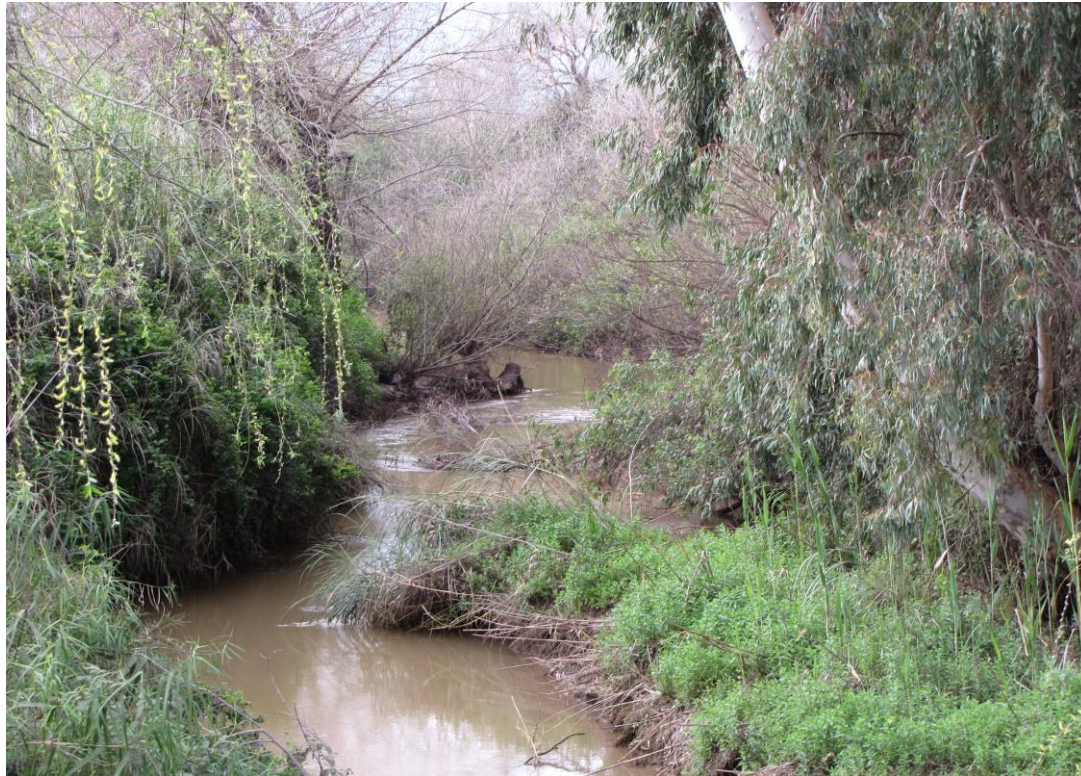

Dan (Peleg Dafna)

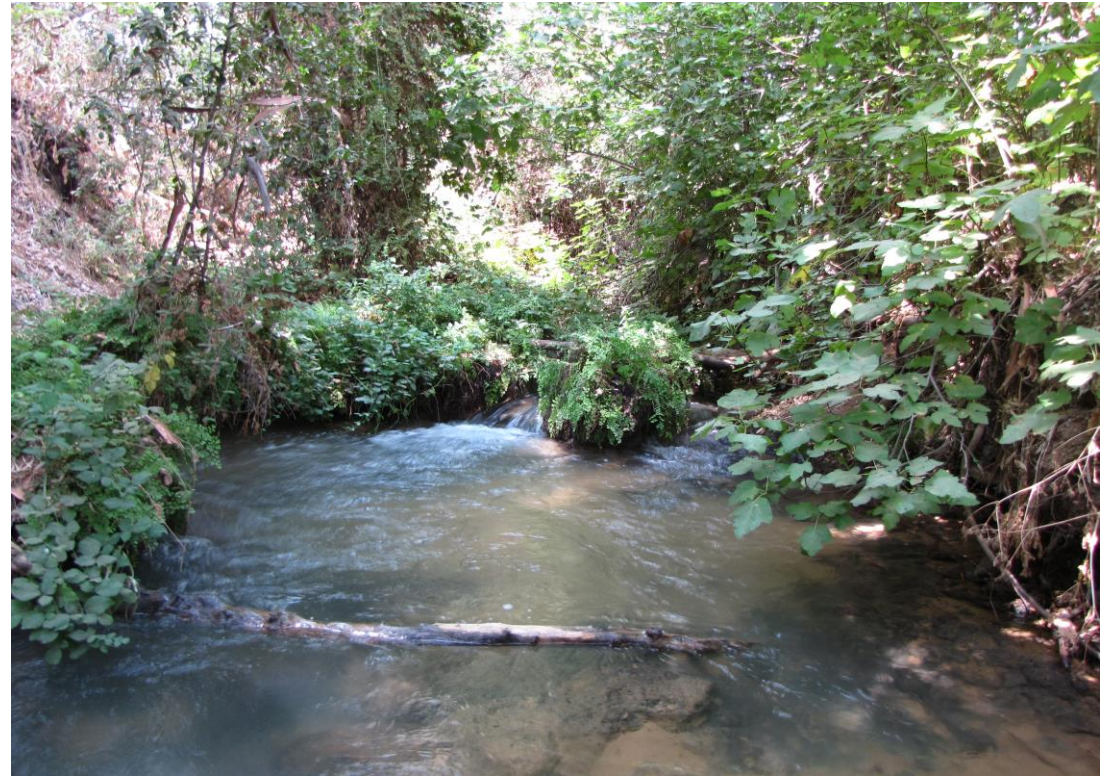



# J1: Upper Jordan - Karst section

Jordan (Kfar Blum)

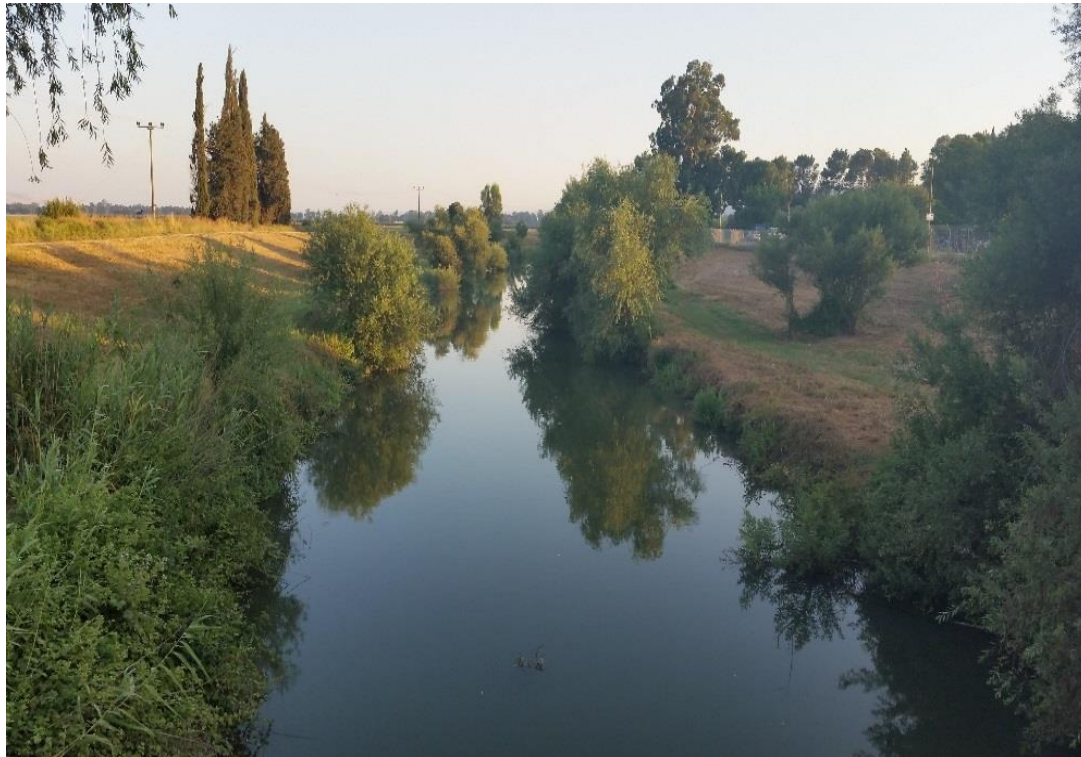

Jordan (Sde Nehemya)

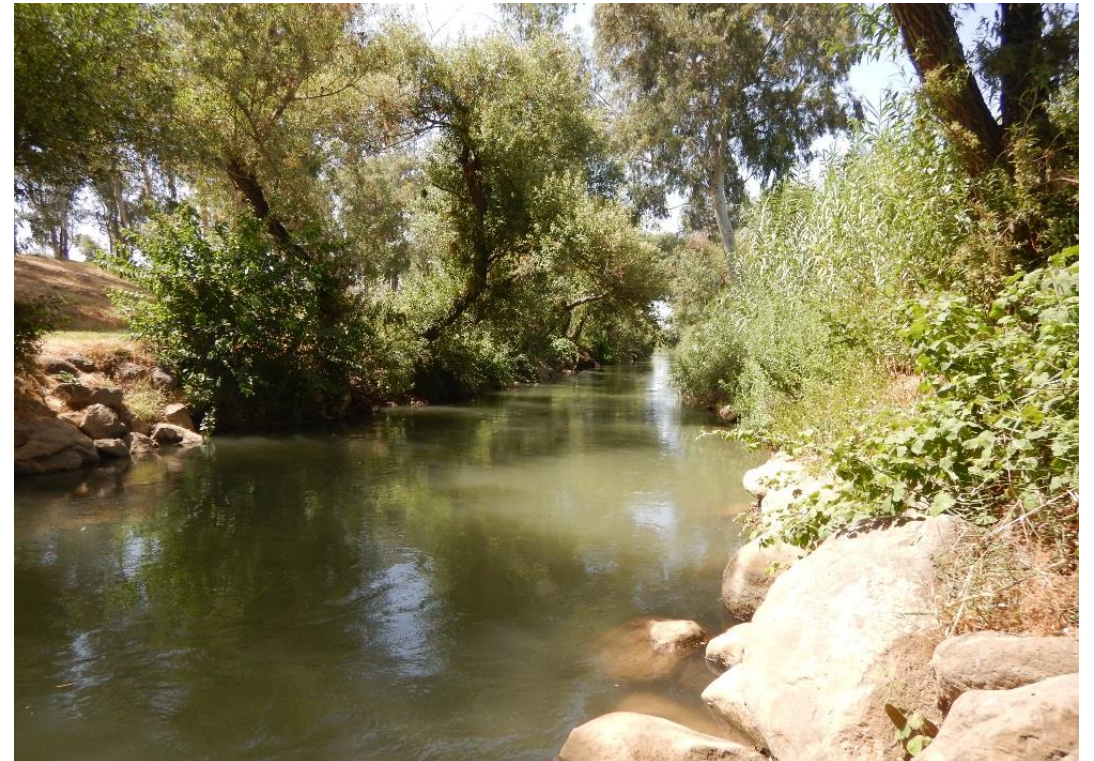



## J2: Upper Jordan – Organic or Fine-sediment section

Jordan (Ha'Pkak Bridge)

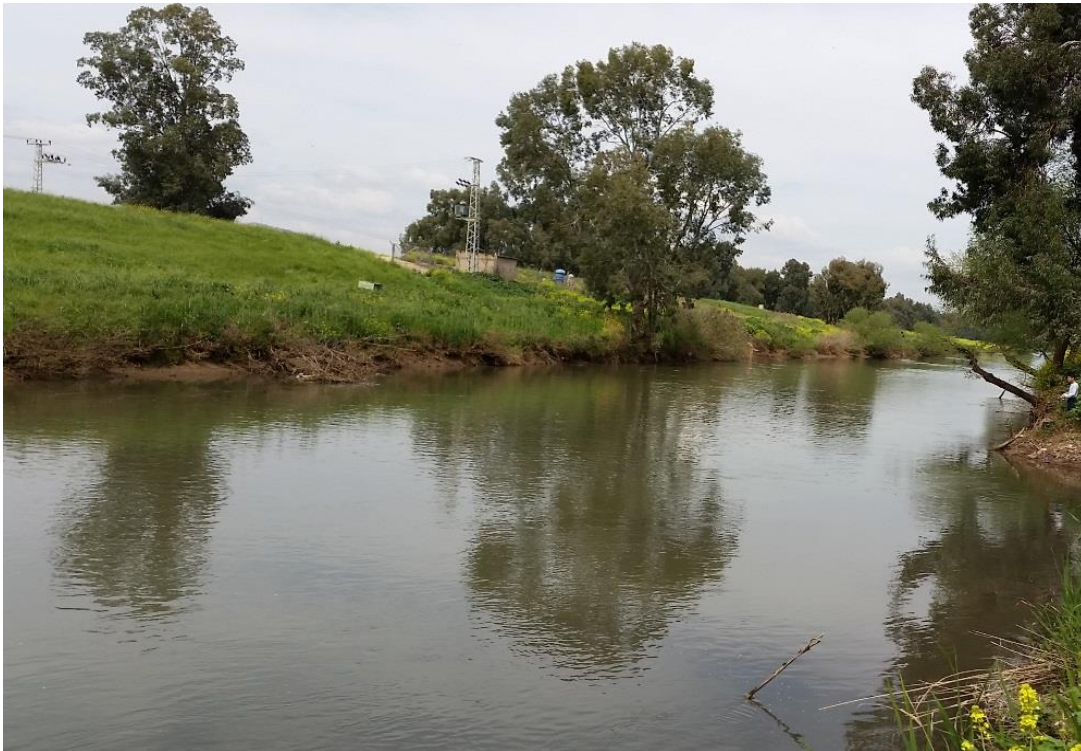

Jordan (Gadot)

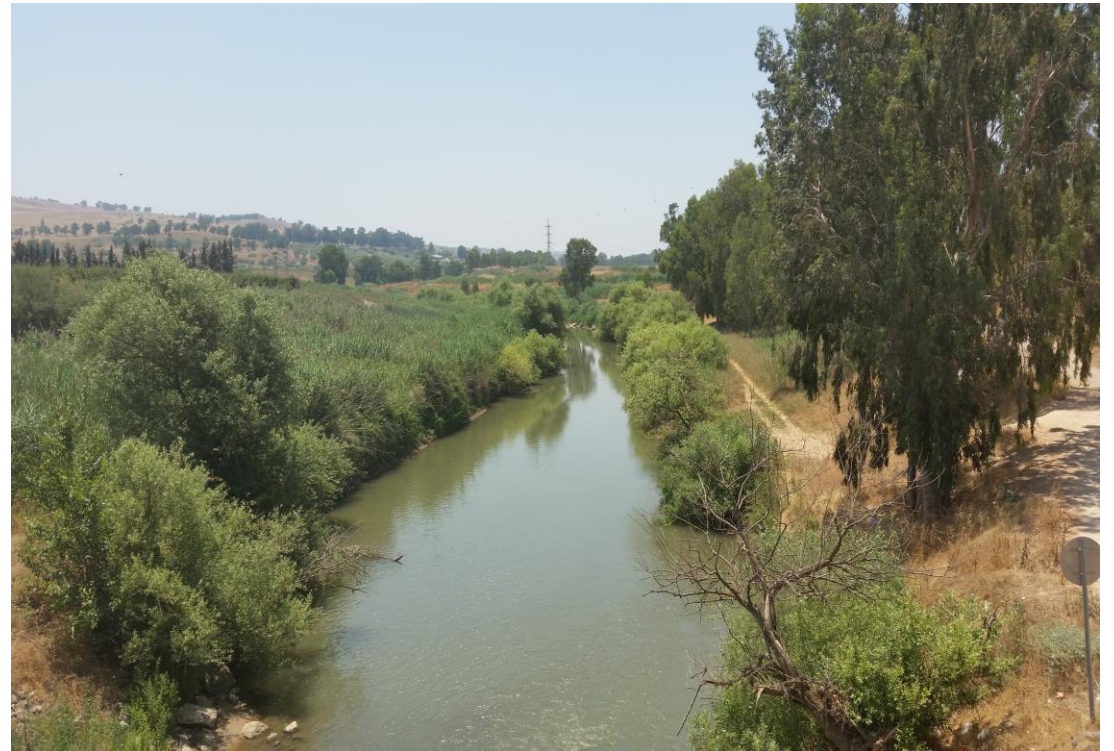



## J3: Upper Jordan – Basalt section

Jordan (Ha'Dodot Bridge)

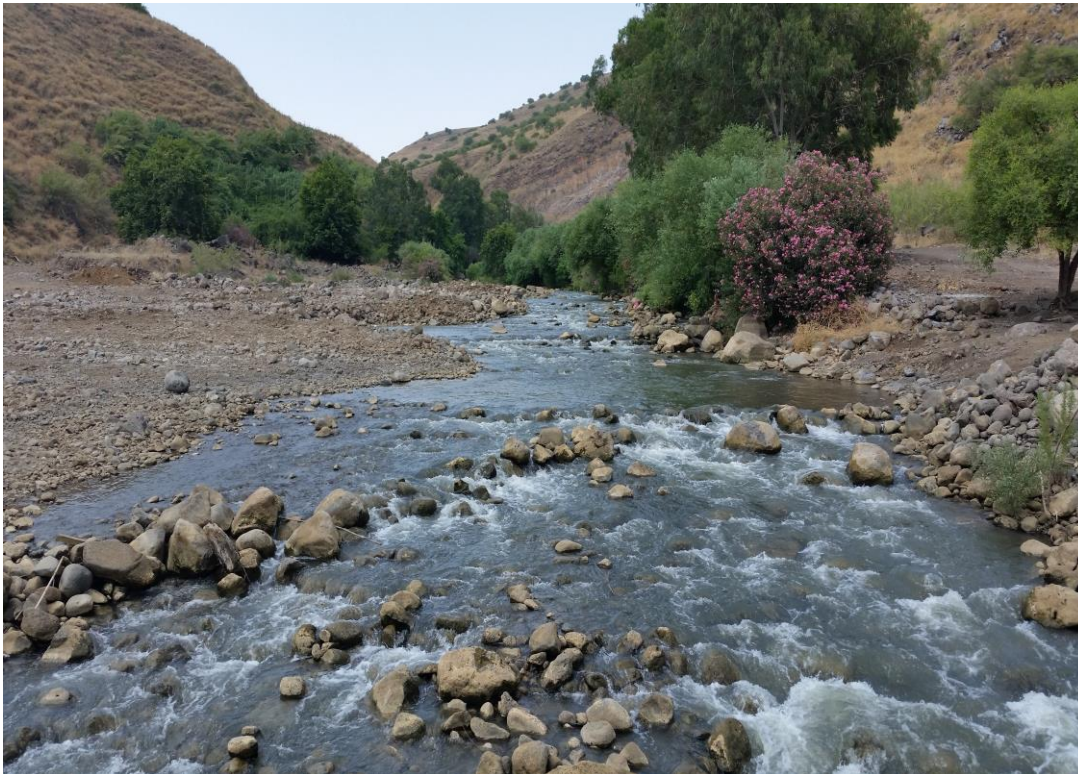

Jordan (Park Ha'Yarden)

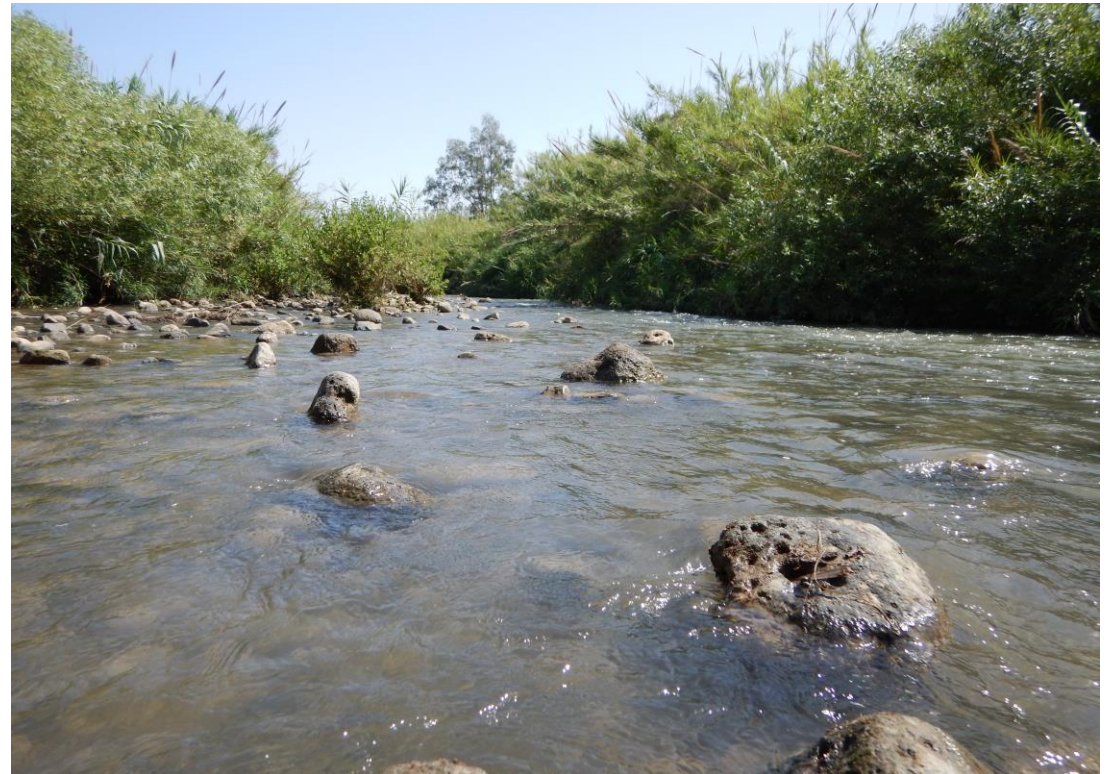

Supplement: Supplementary file 1 [file 1]
